# Supplementary material
Source: PubMed Central journal article supplement (PMC2863598)
Supplement: supp_54_5_2070__1.pdf [file supp_54_5_2070__1.pdf]

## Supplementary Information-1

Supplementary Fig 1

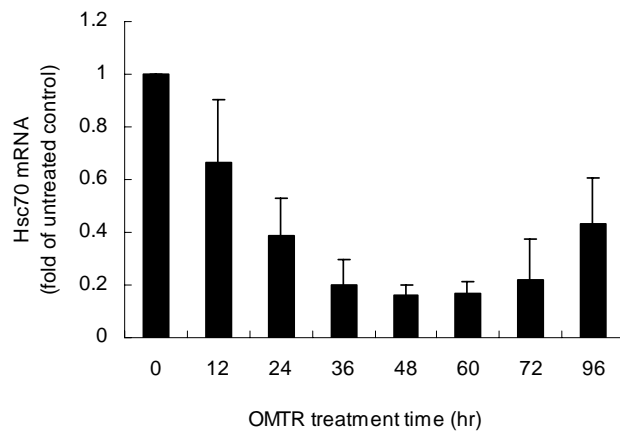

**Figure 1.** Down-regulation of Hsc70 by OMTR (0.4 mg/ml, 1.51 mM) in the HepG2.2.15 cells was reversible in a single-dose treatment.

Supplementary Fig 2

a

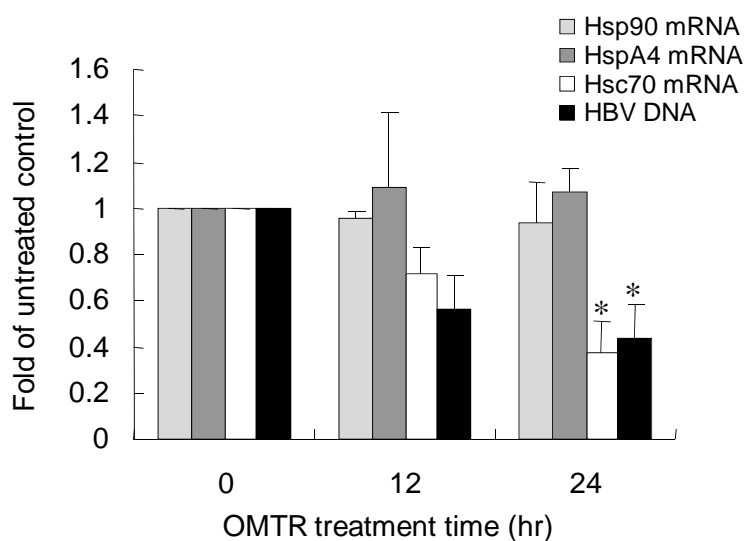

b

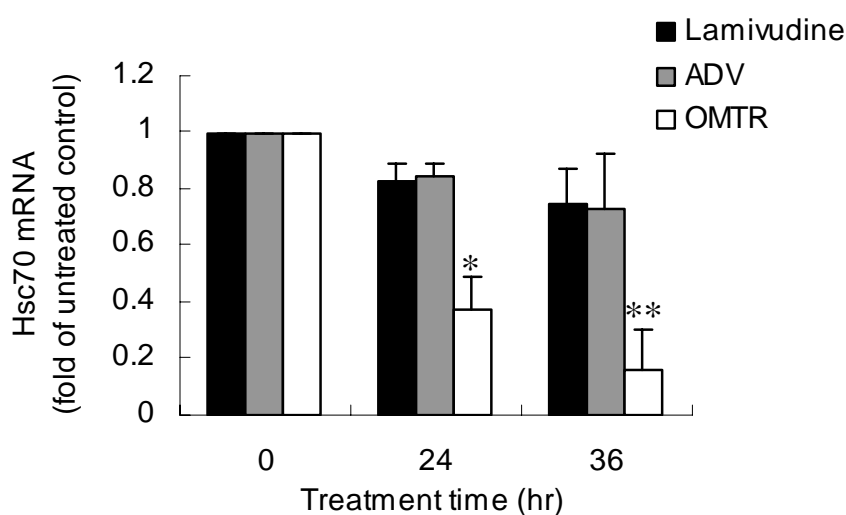

**Figure 2.** Selectivity of OMTR's action on Hsc70

(a) OMTR (0.4 mg/ml, 1.51mM, 24 hrs) selectively down-regulated Hsc70 mRNA expression and suppressed HBV DNA in the HepG2.2.15 cells; the down-regulatory effect was detected in neither Hsp90 nor HspA4. The experiment was performed 3 times. \*  $p < 0.01$ , vs untreated

(b) Different from OMTR (0.4 mg/ml, 1.51mM), lamivudine (3  $\mu$ g/ml, 13 $\mu$ M) and ADV (3  $\mu$ g/ml, 5.9 $\mu$ M) did not change Hsc70 mRNA expression in the HepG2.2.15 cells. For each of the agents in this experiment, their anti-HBV  $IC_{50}$  was used. The experiment was performed 3 times. \*  $p < 0.01$ , \*\*  $p < 0.001$ , vs untreated.
